# Supplementary material for: Genetic restriction of antigen-presentation dictates allergic sensitization and disease in humanized mice
Source: PubMed Central journal article supplement (PMC6014064; doi:10.1016/j.ebiom.2018.04.001), 2018-04-05
Supplement: mmc1.pdf [file mmc1.pdf]

# 1 Genetic restriction of antigen-presentation dictates allergic 2 sensitization and disease in humanized mice

3  
4  
5 Alina Neunkirchner <sup>a,b</sup>, Bernhard Kratzer <sup>a,b,\*</sup>, Cordula Köhler <sup>a,b,\*</sup>, Ursula Smole <sup>b</sup>,  
6 Lukas F. Mager <sup>b</sup>, Klaus G. Schmetterer <sup>b,c</sup>, Doris Trapin <sup>b</sup>, Victoria Leb-Reichl <sup>b</sup>,  
7 Edward Rosloniec <sup>d,e,f</sup>, Ronald Naumann <sup>g</sup>, Lukas Kenner <sup>h,i,j</sup>, Beatrice Jahn-Schmid  
8 <sup>k</sup>, Barbara Bohle, <sup>a,k</sup>, Rudolf Valenta <sup>k</sup>, and Winfried F. Pickl <sup>a,b, \*\*</sup>

## 11 Short title: Humanized allergy mice

13 <sup>a</sup> Christian Doppler Laboratory for Immunomodulation, 1090 Vienna, Austria

14 <sup>b</sup> Institute of Immunology, Medical University of Vienna, 1090 Vienna, Austria

15 <sup>c</sup> Department of Laboratory Medicine, Medical University of Vienna, 1090 Vienna,  
16 Austria

17 <sup>d</sup> Department of Medicine, University of Tennessee Health Science Center, Memphis,  
18 38163 TN, USA.

19 <sup>e</sup> Memphis Veterans Affairs Medical Center, 38104 TN, USA

20 <sup>f</sup> Department of Pathology, University of Tennessee Health Science Center,  
21 Memphis, 38163 TN, USA

22 <sup>g</sup> Max Planck Institute for Molecular Cell Biology and Genetics, 01307 Dresden,  
23 Germany

24 <sup>h</sup> Department of Laboratory Animal Pathology, Medical University of Vienna, 1090  
25 Vienna,  
26 Austria

27 <sup>i</sup> Department of Laboratory Animal Pathology, University of Veterinary Medicine  
28 Vienna, 1210 Vienna, Austria

29 <sup>j</sup> Ludwig Boltzmann Institute for Cancer Research, Vienna, Austria

30 <sup>k</sup> Department of Pathophysiology and Allergy Research, Medical University of Vienna,  
31 1090 Vienna, Austria

32  
33  
34 \* contributed equally to the work

35  
36 \*\* corresponding author: Winfried F. Pickl, MD, Institute of Immunology, Center for  
37 Pathophysiology, Infectiology and Immunology, Medical University of Vienna,  
38 Lazarettgasse 19, 1090 Vienna, Austria. Phone: (+431) 40160 33245. Fax: (+431)  
39 40160 933245. Email address: winfried.pickl@meduniwien.ac.at. ORCID ID:  
40 orcid.org/0000-0003-0430-4952

**43 Appendix A. Supplementary Data**

44 Fig. S1. Illustration of the generation of TCR transgenic targeting constructs using  
45 genomic TCR cassette vectors.

46 Fig. S2. Expression of HLA-DR1 on dendritic cells and elaboration of a mixed set of  
47 cytokines of upon activation TCR-DR1 splenocytes.

48 Fig. S3. Treg paucity and antigen-specific activation of T lymphocytes in the four  
49 mouse lines under study.

50 Fig S4. Art v 1-specific proliferation of CD4<sup>+</sup> T cells as determined by CPD eFluor<sup>®</sup>  
51 450 dilution.

52 Fig. S5. Preferential accumulation of inflammatory cells in the lungs of sole mugwort  
53 aerosol challenged TCR-DR1 mice.

54 Fig. S6. Footpad swelling upon mugwort extract exposure in TCR-DR1 mice.

55 Fig. S7. Intranasal exposure to mugwort pollen extract of TCR-DR1 mice leads to an  
56 increase in lung resistance.

57 Fig. S8. IL-2- $\alpha$ IL-2 complexes expand Treg *in vivo*.

58 Fig. S9. Effects of blocking  $\alpha$ IL-10 mAbs on *in vitro* division of allergen-specific T  
59 cells.

60 Fig. S10. Reduction of allergen-specific immunoglobulin levels in mice treated with IL-  
61 2- $\alpha$ IL-2 complexes.

62 Table S1. List of monoclonal antibodies used for flow cytometric analyses of spleens,  
63 thymi and peripheral blood leukocytes

64 Table S2. Total cell numbers and percentages of indicated cell types in spleen, thymus and  
65 peripheral blood of WT, DR1, TCR and TCR-DR1 transgenic mice.

66

67

68

69 **Supplementary Materials:****FIGURE S1**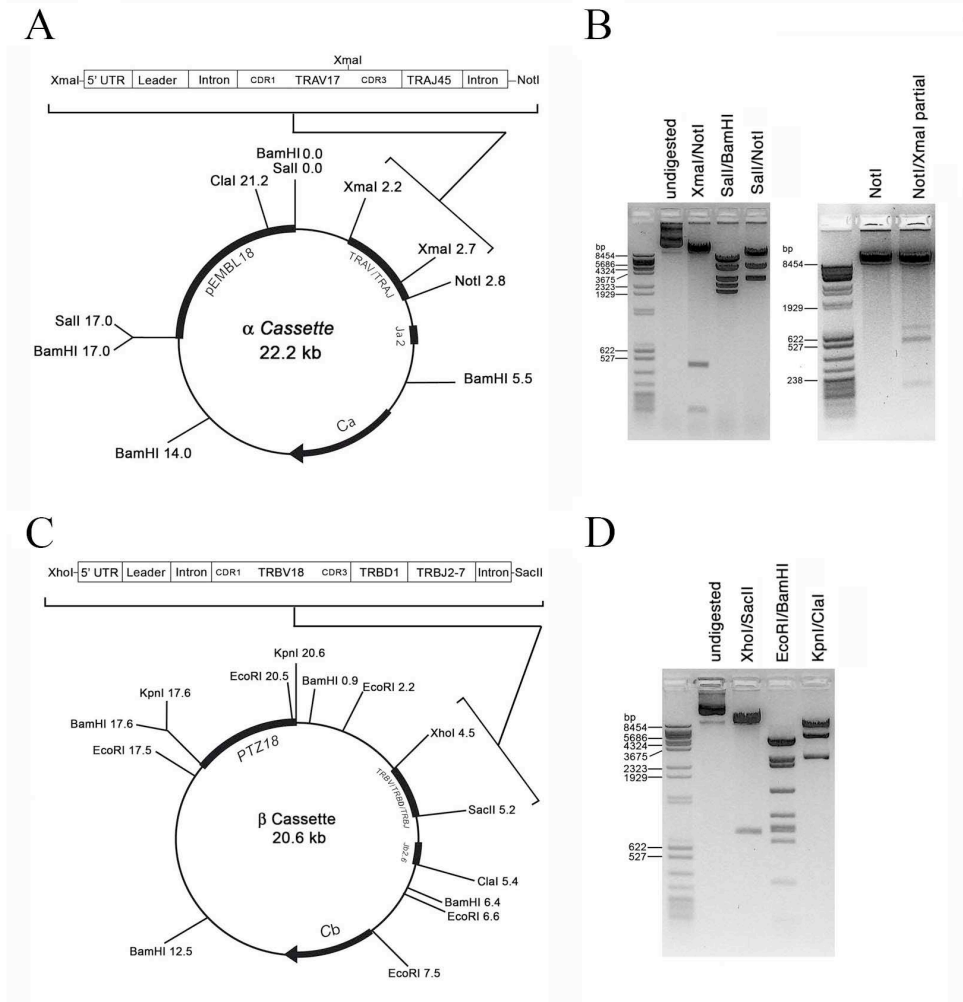

70

71 **Fig. S1. Illustration of the generation of TCR transgenic targeting constructs**  
 72 **using genomic TCR cassette vectors. A,** Schematic depiction of the TCR alpha  
 73 transgenic expression vector. The vector (22.2 kb) consists of 2.2 kb of genomic DNA  
 74 upstream of the murine TCR alpha leader, variable and joining sequence (0.6 kb) and  
 75 14.2 kb of downstream homologous murine TCR sequences including the J $\alpha$ 2, the  
 76 C $\alpha$  exon and the 3' enhancer elements according to Kouskoff et al. (Kouskoff et al.,  
 77 1995) and based on Bluthmann et al. (Bluthmann et al., 1988). The position of the 5.2  
 78 kb prokaryotic vector sequences (pEMBL18) are indicated. Unique restriction sites,  
 79 *Xma I* and *Not I*, were used for inserting the genomic human TCR alpha leader,  
 80 variable and joining sequences, while *Sal I* sites were used to remove the prokaryotic  
 81 plasmid sequences to linearize the entire TCR gene (17.1 kb). **B,** *Xma I/Not I*-  
 82 digested vector DNA was used to identify properly inserted TCR variable sequences

83 and comparisons between the undigested (lane 1) *Xma I/Not I*-digested (lane 2), *Sal*  
84 *I/BamH I*-digested (lane 3) and *Sal I/Not I*-vector (lane 4) and vector DNA partially  
85 digested with *Not I* and *Xma I/Not I* are shown. **C**, Schematic depiction of the TCR  
86 beta transgenic expression vector. The vector (20.6 kb) consists of 4.5 kb of genomic  
87 DNA upstream of the murine TCR beta leader, variable and joining sequence (0.8 kb)  
88 and 12.4 kb of downstream homologous murine TCR beta sequences including the  
89 J $\beta$ 2.6, C $\beta$  exon and 3' enhancer elements according to Kouskoff et al. (Kouskoff et al.,  
90 1995) and based on Bluthmann et al. (Uematsu et al., 1988). The position of the 2.9  
91 kb prokaryotic vector sequences (PTZ18) are indicated. The unique restriction sites  
92 *Xho I* and *Sac II* for inserting the respective genomic human TCR beta leader,  
93 variable, diversity and joining sequences are indicated as well as the *Kpn I* sites used  
94 to remove the prokaryotic plasmid sequences for linearization of the entire TCR beta  
95 gene (17.6 kb). **D**, *Xho I/Sac II*-digested vector DNA was used to identify properly  
96 inserted TCR variable sequences (lane 2) and was compared to undigested vector  
97 DNA (lane 1), digest profile of *Eco RI/Bam HI* (lane 3) or *Kpn I/Cla I* (lane 4)  
98 digestion. Positions of DNA size markers (mixture of  $\lambda$ *Bst EII* digest and pBR322  
99 *Msp I* digest) are indicated.

100

## FIGURE S2

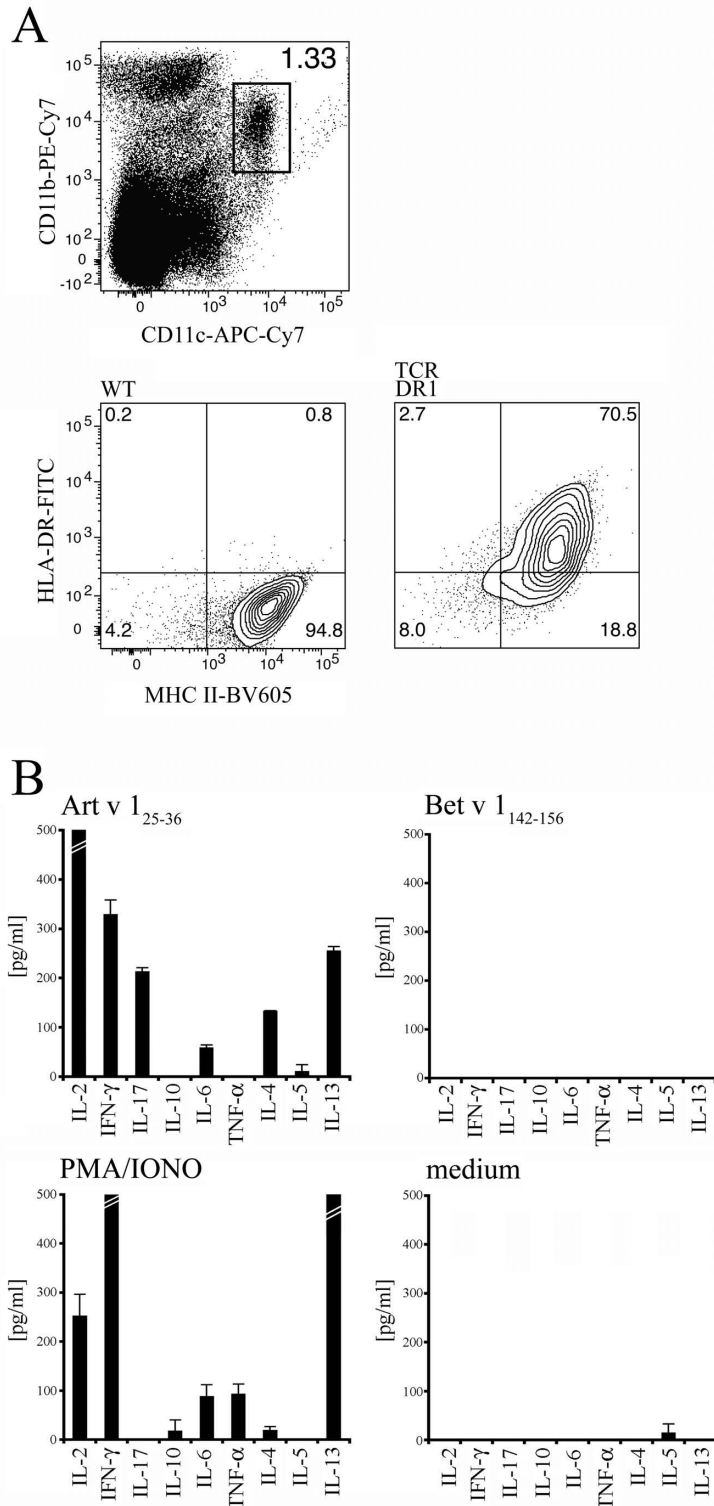

101

102

103 **Fig. S2. Expression of HLA-DR1 on dendritic cells and elaboration of a mixed**  
 104 **set of cytokines of upon activation TCR-DR1 splenocytes. A, Shown is HLA-DR1**  
 105 **expression by flow cytometry on CD11b<sup>+</sup>CD11c<sup>+</sup> dendritic cells of spleens of TCR-**

106 DR1 and WT mice. **B**, Splenocytes of TCR-DR1 mice were incubated with Art v 1<sub>25-36</sub>  
107 peptide, Bet v 1<sub>142-153</sub> peptide, medium alone or PMA plus ionomycin. Art v 1<sub>25-36</sub>  
108 peptide but neither Bet v 1<sub>142-153</sub>-peptide nor medium alone induced production of  
109 high-levels (> 500 pg/ml per 2x10<sup>5</sup> cells /well) of IL-2, intermediate levels (499-200  
110 pg/ml) of IFN- $\gamma$ , IL-13 and IL-17 and low levels (199-10 pg/ml) of IL-4 and IL-6, while  
111 no indication for TNF- $\alpha$ , IL-5 and IL-10 secretion was observed. PMA/ionomycin  
112 incubation, used as positive control, induced clear-cut levels (>10 pg/ml) of IL-2, IFN-  
113  $\gamma$ , IL-10, IL-6, TNF- $\alpha$ , IL-4 and IL-13. Data are representative of two independently  
114 performed experiments.

115

116

117

118

119

120

121

122

123

124

125

126

127

128

129

130

131

132

## FIGURE S3

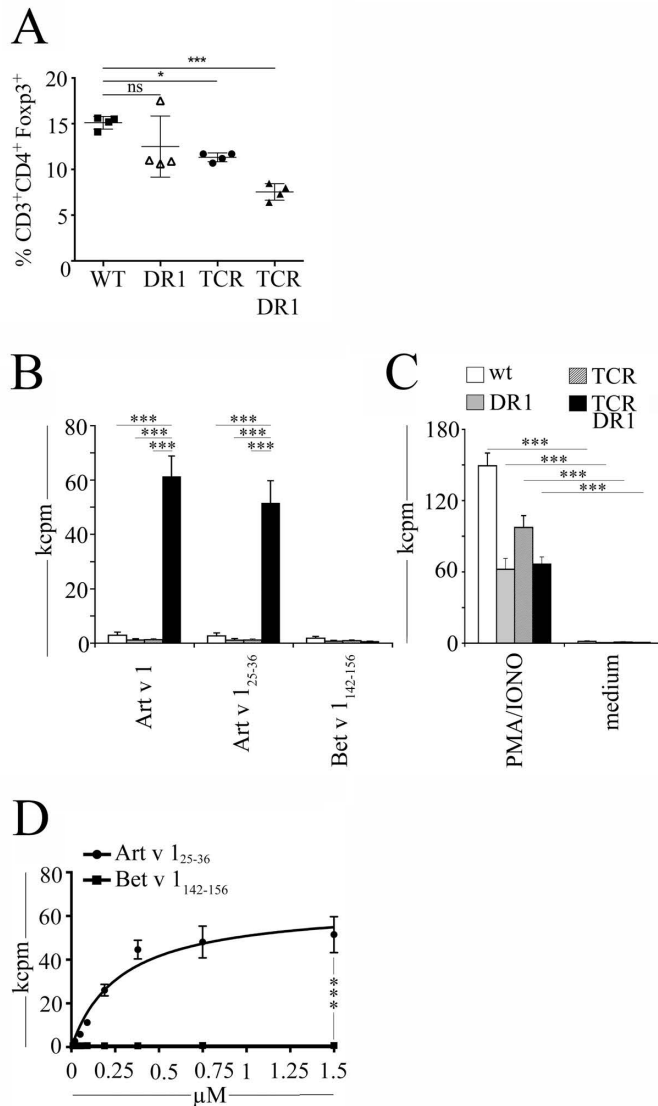

133  
 134  
 135  
 136  
 137  
 138  
 139  
 140  
 141  
 142  
 143  
 144  
 145  
 146  
 147  
 148

**Fig. S3. Treg paucity and antigen-specific activation of T lymphocytes in the four mouse lines under study.**

**A**, Shows the percentages of CD3<sup>+</sup>CD4<sup>+</sup>Foxp3<sup>+</sup> cells in spleens of WT, DR1, TCR and TCR-DR1 mice. Each symbol represents an individual mouse. **B**, Shown is the proliferation of splenocytes (2 x 10<sup>5</sup>/well) from WT, DR1, TCR and TCR-DR1 mice incubated with full length rArt v 1-protein (3 μM), Art v 1<sub>25-36</sub>-peptide or negative control Bet v 1<sub>142-153</sub>-peptide (10 μM) *in vitro*. **C**, Shows additional positive (PMA/ionomycin) and negative (medium) controls. **D**, Shown is the dose dependent proliferation of splenocytes from TCR-DR1 mice upon incubation with Art v 1<sub>25-36</sub>-peptide in comparison to negative control Bet v 1<sub>142-153</sub>-peptide. kcpm indicates kilo counts per minute of incorporated [<sup>3</sup>H]-thymidine. Data shown are mean values ± SEM of triplicate cultures of one experiment, which is representative of four independent experiments. \*\*\* p < 0.001, Kruskal-Wallis test and Mann-Whitney-U-test followed by *post hoc* Bonferroni correction.

149

## FIGURE S4

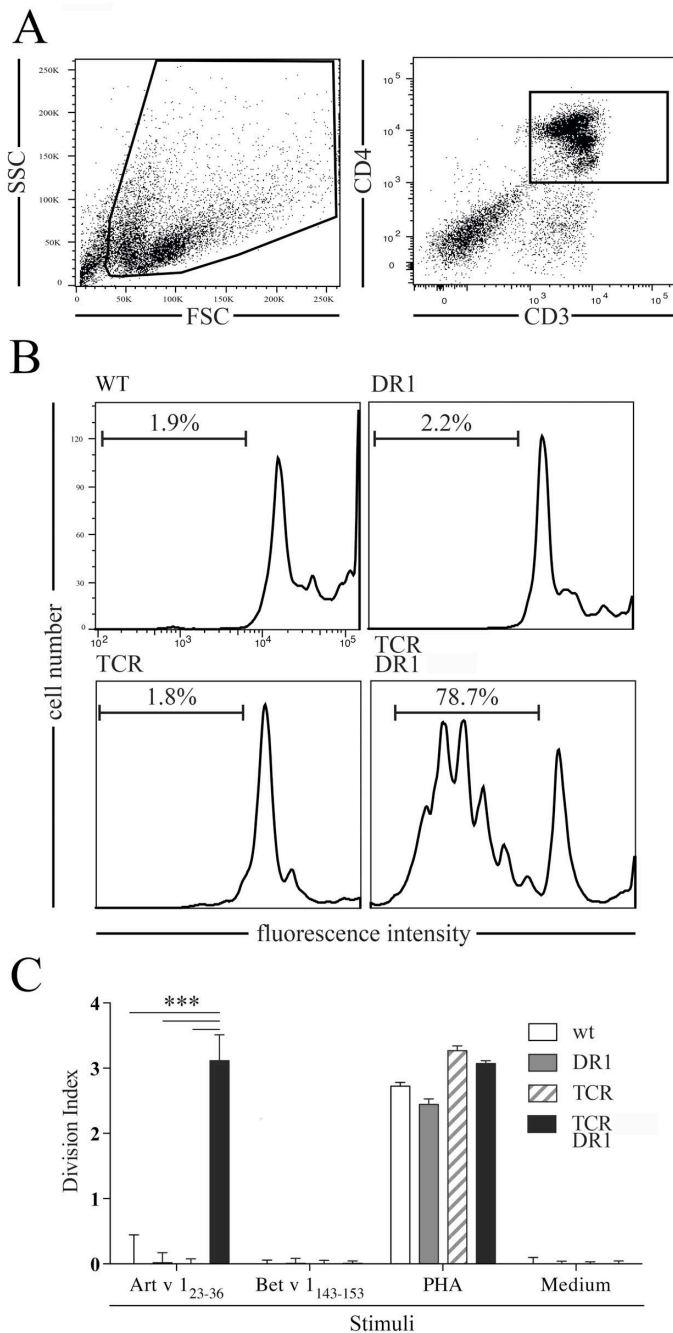

150

151

152 **Fig S4. Art v 1-specific proliferation of CD4<sup>+</sup> T cells as determined by CPD**  
 153 **eFluor<sup>®</sup> 450 dilution.** Flow cytometry analysis showing proliferation of CPD eFluor<sup>®</sup>  
 154 450-labeled CD3<sup>+</sup>CD4<sup>+</sup>TCR T cells, left either untreated (medium) or incubated with  
 155 Art v 1<sub>25-36</sub>-peptide, Bet v 1<sub>142-153</sub>-peptide or PHA for 96 hours. **A**, Dot plots show  
 156 gating strategy, **B**, Histograms show cellular proliferation. Markers show cells,  
 157 which underwent proliferation. **C**, Shown are division indices of CPD-labeled  
 158 CD3<sup>+</sup>CD4<sup>+</sup> T cells calculated according to established methods as described (Asquith et al., 2006).  
 159 Data are representative (A, B) or show the summary (C) of three independent



160 experiments. <sup>\*\*\*</sup>,  $p < 0.001$ ; Kruskal-Wallis test, followed by post hoc Bonferroni  
161 correction.

# FIGURE S5

**A**

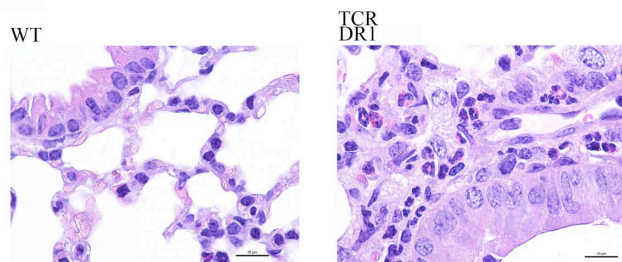

**B**

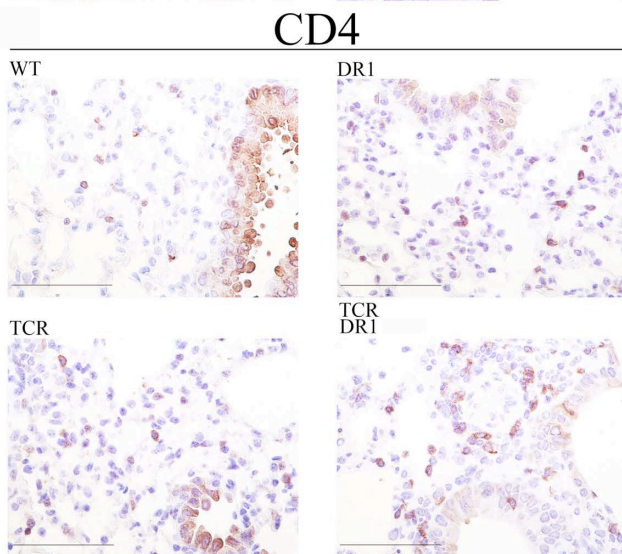

**C**

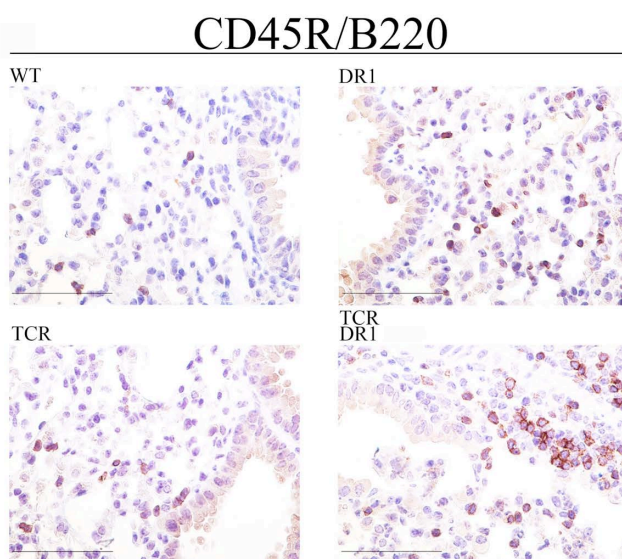

**D**

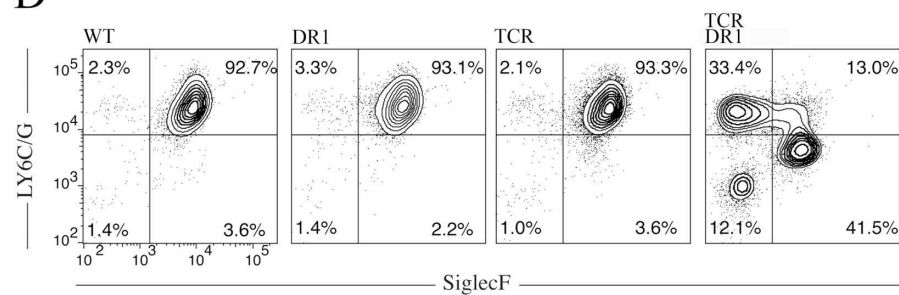

163 **Fig. S5. Preferential accumulation of inflammatory cells in the lungs of sole**  
164 **mugwort aerosol challenged TCR-DR1 mice. A,** Shown are HE-stained lung  
165 sections at high-power magnification, arrowheads show eosinophilic granulocytes. **B,**  
166 and **C,** Shown are immunohistochemical CD4 (b) and CD45R/B220 (c) stainings of  
167 lung tissues analyzed by light microscopy, size bars 50  $\mu\text{m}$ . Data are representative  
168 of three experiments performed. **D,** Shown are two parameter contour plots of flow  
169 cytometric analyses of lung tissues of WT, DR1, TCR and TCR-DR1 mice,  
170 respectively. Only lung homogenates of TCR-DR1 mice show the appearance of high  
171 percentages of LY6C/G<sup>+</sup>SiglecF<sup>neg</sup> neutrophils and of LY6C/G<sup>dim</sup>SiglecF<sup>+</sup> eosinophils.  
172 Numbers show cells in respective quadrants.  
173  
174

175

## FIGURE S6

A

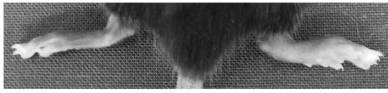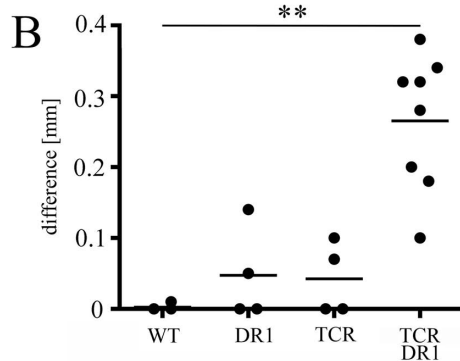

176

177

178

179 **Fig. S6. Footpad swelling upon mugwort extract exposure in TCR-DR1 mice.**

180 WT, DR1, TCR and TCR-DR1 mice were injected with 25  $\mu$ l of allergen extract

181 preparation, corresponding to 375  $\mu$ g whole protein content intradermally into the

182 right hind footpad. The contralateral left hinder food pad was challenged with PBS as

183 control. **A**, Shown is a representative photograph of the hind footpads of a challenged

184 TCR-DR1 mouse. **B**, Shown is the footpad swelling before and after challenge with

185 mugwort extract using a digital thickness gauge. The changes in footpad swelling

186 were determined as follows: Footpad swelling (mm) = footpad thickness after allergen

187 provocation - footpad thickness before allergen provocation. Each symbol shows an

188 individual mouse 72 hours after injection. Eight mice in the TCR-DR1 group were

189 compared to four mice in all other groups. Data are representative of three

190 independent experiments. \*\*,  $p < 0.01$ ; Kruskal-Wallis test followed by post hoc

191 Bonferroni correction

192

193

194

195

196

197

198

199

200

201

202

## 203 FIGURE S7

## 204 A

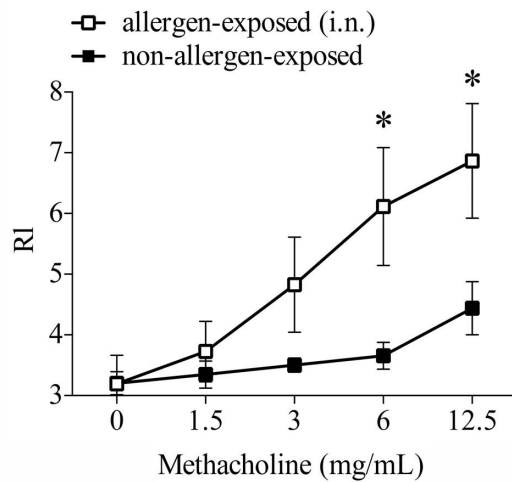

205

206

207 **Fig. S7. Intranasal exposure to mugwort pollen extract of TCR-DR1 mice leads**  
208 **to an increase in lung resistance.** Mice were exposed four times to 450  $\mu$ g  
209 mugwort pollen extract in PBS intranasally in bi-weekly intervals according to the  
210 scheme shown in FIG 3, A. Shown is lung resistance (RI) determined one day after  
211 the last exposure on day 44 (Buxco, Finepoint software) by inhalation of increasing  
212 doses of methacholine as indicated. Every symbol indicates mean lung resistance  
213 levels of each group of mice (allergen exposed versus non-allergen exposed); vertical  
214 lines show the standard error of mean (SEM). Data are representative of five allergen  
215 exposed and four non-allergen exposed mice. \*  $p < 0.05$ , allergen-exposed compared  
216 to non-allergen-exposed mice by Mann-Whitney-U-test.

217

## FIGURE S8

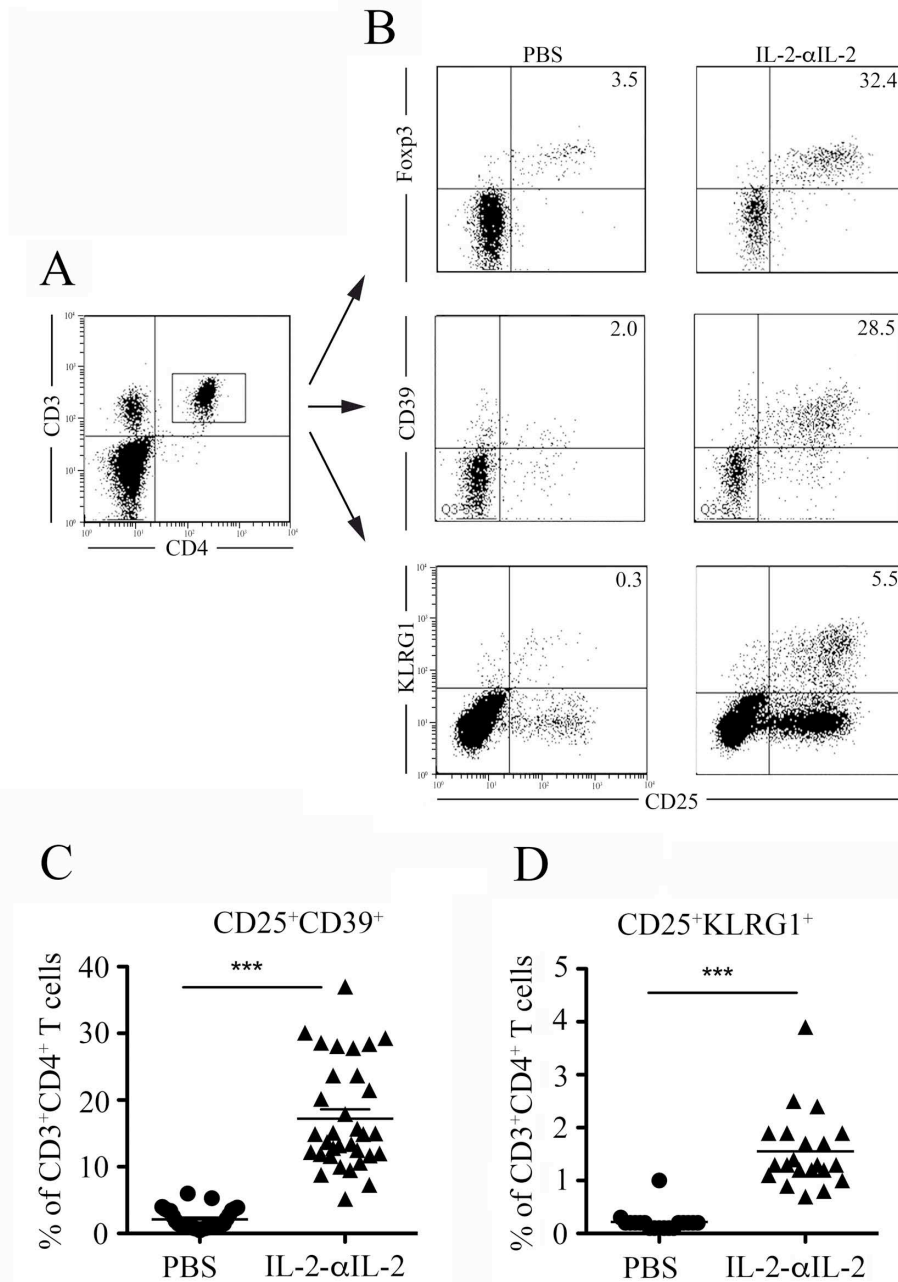

218

219

220

221

222

223

224

225

226

227

228

**Fig. S8. IL-2- $\alpha$ IL-2 complexes expand Treg *in vivo*.** **A**, Gating strategy for analysis of Treg cells expanded by IL-2- $\alpha$ IL-2 complexes **B**, phenotypic appearance and summary of CD3<sup>+</sup>CD4<sup>+</sup>CD25<sup>+</sup> PB T cells co-expressing **C**, CD39 or **D**, KLRG1, respectively, of sham (PBS) or IL-2- $\alpha$ IL-2 treated TCR-DR1 mice obtained on day 6. Numbers indicate the percentages of cells in the double positive quadrant. Each symbol represents an individual mouse. Data are representative (A, B) or show the summary (C, D) of stainings for 33 IL-2- $\alpha$ IL-2 (except 21 for CD25/KLRG1) and 30 PBS treated (except 19 for CD25/KLRG1) mice per group that were analyzed in five independent experiments. **\*\*\***,  $p < 0.001$ , Unpaired two-tailed Student's t-test (d) and ANOVA, followed by Tukey's multiple comparison test.

## FIGURE S9

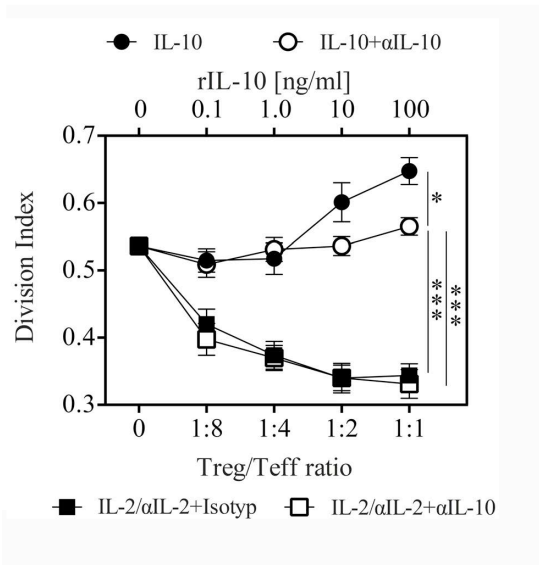

229  
 230  
 231  
 232  
 233  
 234  
 235  
 236  
 237  
 238  
 239  
 240  
 241  
 242  
 243  
 244

**Fig. S9. Effects of blocking  $\alpha$ IL-10 mAbs on *in vitro* division of allergen-specific T cells.** FACS-sorted  $CD3^+CD4^+CD25^-$  effector T cells from allergen-naive TCR-DR1 mice were incubated with FACS-sorted  $CD3^+CD4^+CD25^{bright}$  Treg of IL-2- $\alpha$ -IL-2 complex treated TCR-DR1 mice at the indicated ratios. Either isotype control or  $\alpha$ IL-10 mAb ( $20\mu\text{g/ml}$ ) were added to the culture together with  $1\mu\text{M}$  of Art v  $1_{23-36}$  peptide along with DC2.4 DR1 $^+$  dendritic cells, serving as APCs. Proliferation of effector T cells labelled with violet-CPD is represented as division index obtained after 96 hours. Instead of Treg, soluble rIL-10 in the presence of  $\alpha$ IL-10 or isotype control mAb added to the cultures served as control. Shown are the mean  $\pm$  SEM division indices pooled from two independent experiments. \*  $p < 0.05$ , \*\*\*  $p < 0.001$ . One-way ANOVA followed by Tukey's multiple comparison test.

## FIGURE S10

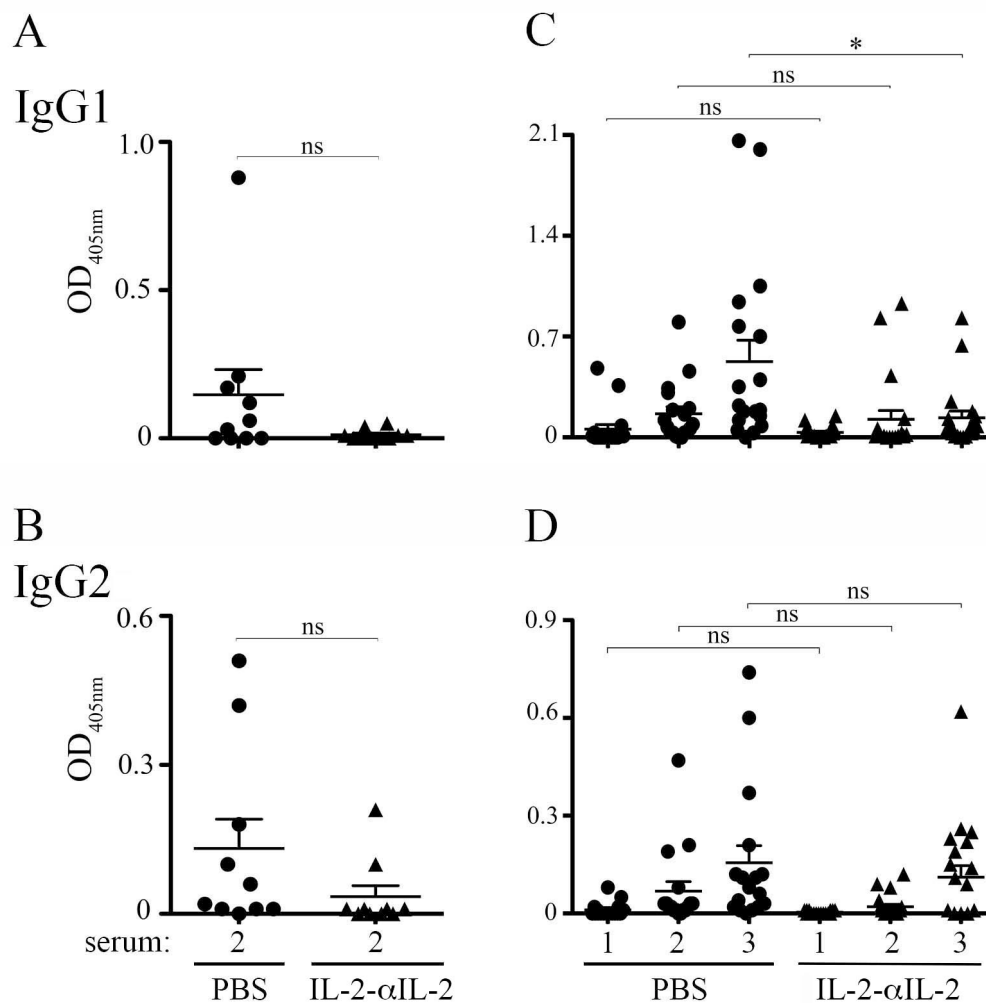

245  
246

247 **Fig. S10. Reduction of allergen-specific immunoglobulin levels in mice treated**  
248 **with IL-2- $\alpha$ IL-2 complexes.**

249 Allergen-specific serum immunoglobulin **A**, and **C**, IgG1 and **B**, and **D**, IgG2 levels  
250 upon prophylactic (A, B) or therapeutic (C, D) treatment of mice with IL-2- $\alpha$ IL-2  
251 complexes. Serum immunoglobulin levels of mice treated with PBS were used as  
252 control. Shown are Art v 1-specific IgG1 and IgG2 levels determined by ELISA and  
253 expressed in arbitrary units (OD 405nm). Each symbol represents an individual  
254 mouse. Data show the summary of 10 (A, B) or 20 (except 18 for PBS treated) (C, D)  
255 mice per group analyzed in two (A, B) or three (C, D) independent experiments. ns,  
256 not significant, \*  $p < 0.05$ , ANOVA, followed by Student's t-test.

257

258



259

260

261 **Table S1. List of monoclonal antibodies**

262

263 **Table S1A. List of monoclonal antibodies used for flow cytometric analyses of**  
264 **spleens, thymi and peripheral blood leukocytes**

| Specificity         | Clone name | Species | conjugated to | Source                           |
|---------------------|------------|---------|---------------|----------------------------------|
| CD3                 | 500A2      | hamster | FITC          | eBioscience, San Diego, CA, USA  |
| CD3                 | 17A2       | rat     | eFluor450     | eBioscience, San Diego, CA, USA  |
| CD4                 | RM4-5      | rat     | eV450         | eBioscience, San Diego, CA, USA  |
| CD4                 | RM4-5      | mouse   | APC           | eBioscience, San Diego, CA, USA  |
| CD8                 | 5H10       | rat     | APC           | Invitrogen, Camarillo, CA, USA   |
| CD14                | rmC5-3     | rat     | PE            | Becton Dickinson, Palo, Alto, CA |
| CD45R/B220          | RA3-6B2    | rat     | FITC          | eBioscience, San Diego, CA, USA  |
| CD45R/B220          | RA3-6B2    | rat     | PB            | eBioscience, San Diego, CA, USA  |
| CD90.2 (Thy1.2)     | 53-2.1     | rat     | APC           | eBioscience, San Diego, CA, USA  |
| Ly6C+6G             | RB6-8C5    | rat     | FITC          | Becton Dickinson, Palo, Alto, CA |
| HLA-CII             | L243       | mouse   | FITC          | BioLegend, San Diego, CA, USA    |
| HLA-CII             | L243       | mouse   | PerCP         | BioLegend, San Diego, CA, USA    |
| TRBV18              | BA62.6     | mouse   | PE            | Immunotech, Marseille, France    |
| TCR $\gamma/\delta$ | GL3        | hamster | FITC          | BioLegend, San Diego, CA, USA    |
| control             | eBio299Arm | hamster | FITC          | eBioscience, San Diego, CA, USA  |
| control             | P3.6.2.8.1 | mouse   | PE            | eBioscience, San Diego, CA, USA  |
| control             | MOPC-21    | mouse   | PerCp         | BioLegend, San Diego, CA, USA    |
| control             | MOPC-21    | rat     | APC           | BioLegend, San Diego, CA, USA    |
| control             | RTK2758    | rat     | PO/PB         | BioLegend, San Diego, CA, USA    |

265

266

267 **Table S1B. List of monoclonal antibodies used for flow cytometric analysis**  
268 **BALF**

| Specificity | Clone name | Species | conjugated to   | Source                           |
|-------------|------------|---------|-----------------|----------------------------------|
| CD16/CD32   | 2.4G2      | rat     | -               | Becton Dickinson, Palo, Alto, CA |
| CD45        | 30-F11     | rat     | Alexa Fluor 700 | Becton Dickinson, Palo, Alto, CA |
| CD3         | 500A2      | hamster | PE              | eBioscience, San Diego, CA, USA  |
| CD4         | L3T4       | rat     | Pe-Cy7          | Becton Dickinson, Palo, Alto, CA |
| CD11c       | HL3        | hamster | APC-Cy7         | Becton Dickinson, Palo, Alto, CA |

|             |             |         |                 |                                  |
|-------------|-------------|---------|-----------------|----------------------------------|
| CD45R/B220  | RA3-6B2     | rat     | PB              | BioLegend, San Diego, CA, USA    |
| CD19        | 1D3         | rat     | V450            | Becton Dickinson, Palo, Alto, CA |
| CCR3        | 83103       | rat     | Alexa Fluor 647 | Becton Dickinson, Palo, Alto, CA |
| Siglec-F    | E50-2440    | rat     | Alexa Fluor 647 | Becton Dickinson, Palo, Alto, CA |
| Ly6C+6G     | RB6-8C5     | rat     | FITC            | Becton Dickinson, Palo, Alto, CA |
| Ly6C+6G     | RB6-8C5     | rat     | Pacific Orange  | Molecular Probes                 |
| CD117       | 2B8         | rat     | PE-CF594        | Becton Dickinson, Palo, Alto, CA |
| IgE         | R35-72      | rat     | FITC            | Becton Dickinson, Palo, Alto, CA |
| NK-1.1      | PK136       | rat     | PerCP-Cy5.5     | Becton Dickinson, Palo, Alto, CA |
| HLA-DR      | L243        | mouse   | PerCP           | BioLegend, San Diego, CA, USA    |
| MHC I-A/I-E | M5/114.15.2 | rat     | PerCP           | BioLegend, San Diego, CA, USA    |
| control     | eBio299Arm  | hamster | FITC            | eBioscience, San Diego, CA, USA  |
| control     | P3.6.2.8.1  | mouse   | PE              | eBioscience, San Diego, CA, USA  |
| control     | MOPC-21     | mouse   | PerCp           | BioLegend, San Diego, CA, USA    |
| control     | MOPC-21     | rat     | APC             | BioLegend, San Diego, CA, USA    |
| control     | RTK2758     | rat     | PO/PB           | BioLegend, San Diego, CA, USA    |

269

270

271 **Table S1C. List of monoclonal antibodies used for flow cytometric analyses of**  
 272 **Foxp3 expression in peripheral blood**

| Specificity | Clone name | Species | conjugated to | Source                           |
|-------------|------------|---------|---------------|----------------------------------|
| CD3         | 500A2      | hamster | PerCP-Cy5.5   | eBioscience, San Diego, CA, USA  |
| CD4         | RM4-5      | rat     | BV510         | Becton Dickinson, Palo, Alto, CA |
| CD25        | PC61       | rat     | BV421         | Becton Dickinson, Palo, Alto, CA |
| CD39        | 24DMS1     | rat     | PE-Cy7        | eBioscience, San Diego, CA, USA  |
| Foxp3       | FJK-16s    | rat     | APC           | eBioscience, San Diego, CA, USA  |
| KLRG1       | 2F1        | hamster | FITC          | eBioscience, San Diego, CA, USA  |
| TRBV18      | BA62.6     | mouse   | PE            | Immunotech, Marseille, France    |
| control     | eBio299Arm | hamster | PerCP-Cy5.5   | eBioscience, San Diego, CA, USA  |
| control     | P3.6.2.8.1 | mouse   | PE            | eBioscience, San Diego, CA, USA  |
| control     | eBio299Arm | mouse   | FITC          | BioLegend, San Diego, CA, USA    |
| control     | MOPC-21    | rat     | APC           | BioLegend, San Diego, CA, USA    |
| control     | RTK2758    | rat     | PE-Cy7        | BioLegend, San Diego, CA, USA    |
| control     | R35-95     | rat     | BV510         | Becton Dickinson, Palo, Alto, CA |
| control     | R35-95     | rat     | BV421         | Becton Dickinson, Palo, Alto, CA |

273

274

275 **Table S1D. List of monoclonal antibodies used for flow cytometric analyses of**  
 276 **transcription factors and cytokines in lung homogenates**

| Specificity   | Clone name | Species | conjugated to   | Source                           |
|---------------|------------|---------|-----------------|----------------------------------|
| CD3           | 500A2      | hamster | FITC            | eBioscience, San Diego, CA, USA  |
| CD4           | RM4-5      | rat     | Alexa Fluor 700 | Becton Dickinson, Palo Alto, CA  |
| T-bet         | eBio4B10   | mouse   | PerCP-Cy5.5     | eBioscience, San Diego, CA, USA  |
| GATA3         | L50-823    | mouse   | PE-Cy7          | Becton Dickinson, Palo Alto, CA  |
| Foxp3         | FJK-16s    | rat     | APC             | eBioscience, San Diego, CA, USA  |
| IFN- $\gamma$ | XMG1.2     | rat     | APC             | eBioscience, San Diego, CA, USA  |
| IL-13         | eBio13A    | rat     | PE              | eBioscience, San Diego, CA, USA  |
| control       | eBio299Arm | hamster | FITC            | eBioscience, San Diego, CA, USA  |
| control       | R35-95     | rat     | Alexa Fluor 700 | Becton Dickinson, Palo Alto, CA, |
| control       | P3.6.2.8.1 | mouse   | PerCP-Cy5.5     | eBioscience, San Diego, CA, USA  |
| control       | MOPC-21    | mouse   | PE-Cy7          | Becton Dickinson, Palo Alto, CA  |
| control       | RTK2758    | rat     | APC             | BioLegend, San Diego, CA, USA    |
| control       | R35-95     | rat     | PE              | Becton Dickinson, Palo Alto, CA  |

277

278 Abbreviations: APC, allophycocyanine; PE, phycoerythrin; Cy, cyanine; PerCP, peridinin chlorophyll protein;  
 279 FITC, fluorescein isothiocyanate, PO/PB, pacific orange/pacific blue, BV, brilliant violet

280

281

282 **Table S1E. List of monoclonal antibodies used for cytometric bead array-based**  
 283 **analyses of secreted cytokines**

| Specificity   | Clone name | Species | conjugated to | Source                          |
|---------------|------------|---------|---------------|---------------------------------|
| IL-4          | 11B11      | rat     |               | eBioscience, San Diego, CA, USA |
| IL-5          | TRFK5      | rat     |               | eBioscience, San Diego, CA, USA |
| IL-13         | eBio13A    | rat     |               | eBioscience, San Diego, CA, USA |
| IFN- $\gamma$ | AN-18      | rat     |               | eBioscience, San Diego, CA, USA |
| IL-4          | BVD6-24G2  | rat     | biotin        | eBioscience, San Diego, CA, USA |
| IL-5          | TRFK4      | rat     | biotin        | eBioscience, San Diego, CA, USA |
| IL-13         | eBio1316H  | rat     | biotin        | eBioscience, San Diego, CA, USA |
| IFN- $\gamma$ | R4-6A2     | rat     | biotin        | eBioscience, San Diego, CA, USA |
| Streptavidin  |            |         | PE            | eBioscience, San Diego, CA, USA |

284 **Table S2. Total cell numbers and percentages of indicated cell types in spleen,**  
 285 **thymus and peripheral blood of WT, DR1, TCR and TCR-DR1 transgenic mice.**

286

|                     |         | Spleen      |                                            | Thymus      |                                            | Peripheral Blood |                                                       |
|---------------------|---------|-------------|--------------------------------------------|-------------|--------------------------------------------|------------------|-------------------------------------------------------|
|                     |         | Percentages | Absolute numbers (*10 <sup>6</sup> /organ) | Percentages | Absolute numbers (*10 <sup>6</sup> /organ) | Percentages      | Absolute numbers (*10 <sup>3</sup> /mm <sup>3</sup> ) |
| <b>T cells</b>      |         |             |                                            |             |                                            |                  |                                                       |
| CD3                 | WT      | 25.1±3.8    | 24.4±9.8                                   | 96.7±0.7    | 147.1±33.6                                 | 27.0±4.4         | 3.6±0.2                                               |
| (TRBV18+)           |         | 0.2± 0.2    | 0.2±0.1                                    | 0.0±0.0     | 0.3±0.0                                    | 0.0±0.0          | 0.2±0.0                                               |
| CD3                 | DR1     | 24.9± 5.5   | 20.7±4.1                                   | 96.0±1.5    | 135.6±53.7                                 | 35.8±3.6         | 3.3±0.8                                               |
| (TRBV18+)           |         | 0.2± 0.1    | 0.1±0                                      | 0.0±0.0     | 0.3±0.0                                    | 0.0±0.0          | 0.0±0.0                                               |
| CD3                 | TCR     | 17.3± 2.5   | 20.7± 2.0                                  | 95.9±0.5    | 72.8±30.9                                  | 19.3±4.7         | 1.9±0.5                                               |
| (TRBV18+)           |         | 7.6±3.7     | 9.0± 4.1                                   | 12.7±2.7    | 25.9±4.3                                   | 13.9±4.0         | 1.4±0.5                                               |
| CD3                 | TCR/DR1 | 19.5±4.4    | 20.4±6.6                                   | 96.1±1.2    | 103.1±30.3                                 | 24.0±3.2         | 3.0±0.5                                               |
| (TRBV18+)           |         | 14.6± 5.0   | 14.9±4.6                                   | 11.3±1.5    | 63.1±4.8                                   | 17.8±2.9         | 2.2±0.4                                               |
| CD4                 | WT      | 14.4± 2.8   | 14.0± 5.8                                  | 9.8±0.9     | 15.0±4.0                                   | 14.1±2.8         | 2.0±0.1                                               |
| (TRBV18+)           |         | 0.1± 0      | 0.1±0.0                                    | 0.1±0.1     | 0.2±0.1                                    | 0.0±0.0          | 0.0±0                                                 |
| CD4                 | DR1     | 19.1± 4.9   | 15.7±3.1                                   | 17.3±2.8    | 23.2±5.8                                   | 26.2±2.7         | 2.4±0.6                                               |
| (TRBV18+)           |         | 0.1± 0.1    | 0.1±0.1                                    | 0.2±0.2     | 0.2±0.1                                    | 0.0±0.0          | 0.0±0.0                                               |
| CD4                 | TCR     | 11.3± 1.4   | 13.5±0.4                                   | 8.9±2.7     | 6.9±4.4                                    | 11.6±2.6         | 1.1±0.3                                               |
| (TRBV18+)           |         | 4.8±3.4     | 6.3±3.9                                    | 5.0±3.1     | 4.0±2.7                                    | 8.0±4.3          | 0.8±0.4                                               |
| CD4                 | TCR/DR1 | 17.5±4.0    | 18.2±5.4                                   | 20.3±4.8    | 22.0±9.2                                   | 19.5±3.0         | 2.4±0.5                                               |
| (TRBV18+)           |         | 9.1±7       | 13.6±7.1                                   | 11.3±5.6    | 18.7±6.4                                   | 12.1±8.1         | 1.6±1.1                                               |
| CD8                 | WT      | 8.7± 1.9    | 8.7±4.3                                    | 4.2±0.4     | 6.4±1.8                                    | 8.8±1.4          | 1.1±0.2                                               |
| (TRBV18+)           |         | 0.0± 0.0    | 0.0±0.0                                    | 0.0±0.0     | 0.0±0.0                                    | 0.0±0.0          | 0.0±0.0                                               |
| CD8                 | DR1     | 3.9± 1.1    | 3.2±0.8                                    | 3.4±0.6     | 4.7±1.8                                    | 6.1±0.3          | 0.6±0.1                                               |
| (TRBV18+)           |         | 0.0± 0.0    | 0.0±0.0                                    | 0.0±0.0     | 0.0±0.0                                    | 0.0±0.0          | 0.0±0.0                                               |
| CD8                 | TCR     | 4.0± 1.6    | 4.8±1.8                                    | 5.0±2.2     | 3.8±2.0                                    | 4.7±1.5          | 0.5±0.2                                               |
| (TRBV18+)           |         | 1.1± 0.8    | 1.3±0.8                                    | 1.3±0.5     | 1.0±0.6                                    | 3.5±1.3          | 0.3±0.1                                               |
| CD8                 | TCR/DR1 | 0.8± 0.5    | 0.8±0.4                                    | 2.8±0.9     | 3.1±1.6                                    | 0.8±0.5          | 0.1±0.1                                               |
| (TRBV18+)           |         | 0.4± 0.3    | 0.4±0.2                                    | 1.9±0.8     | 2.2±1.3                                    | 0.6±0.3          | 0.1±0.0                                               |
| <b>B cells</b>      |         |             |                                            |             |                                            |                  |                                                       |
| CD45R               | WT      | 52.3±5.9    | 49.3±13.3                                  | 0.8±0.8     | 1.2±1.4                                    | 45.1±4.8         | 6.2±1.8                                               |
| HLA-DRB1*01:01+     |         | 0.1±0.1     | 0.1±0.1                                    | 0.0±0.0     | 0.0±0.0                                    | 0.1±0.0          | 0±0                                                   |
| CD45R               | DR1     | 37.0±2.5    | 32.7±11.8                                  | 0.2±0.1     | 0.2±0.1                                    | 26.2±2.4         | 2.4±0.5                                               |
| HLA-DRB1*01:01+     |         | 29.1±1.3    | 25.3±8.0                                   | 0.2±0.1     | 0.1±0.1                                    | 22.4±1.7         | 2.0±0.4                                               |
| CD45R               | TCR     | 69.7±13.5   | 69.7±13.5                                  | 2.2±0.7     | 1.6±0.8                                    | 46.2±3.8         | 4.5±0.8                                               |
| HLA-DRB1*01:01+     |         | 0.2±0.0     | 0.2±0.0                                    | 0.0±0.0     | 0.0±0.0                                    | 0.2±0.0          | 0±0                                                   |
| CD45R               | TCR/DR1 | 48.9±26.5   | 48.9±26.5                                  | 0.6±0.2     | 0.7±0.2                                    | 38.7±4.0         | 4.9±0.9                                               |
| HLA-DRB1*01:01+     |         | 40.6±23.6   | 40.6±23.6                                  | 0.6±0.1     | 0.6±0.1                                    | 33.5±2.9         | 4.2±0.7                                               |
| <b>Lymphocytes</b>  |         |             |                                            |             |                                            |                  |                                                       |
|                     | WT      | 80.0±4.9    | 76.7±25.0                                  | 96.1±0.9    | 145.9±32.0                                 | 71.6±3.6         | 9.8±2.3                                               |
|                     | DR1     | 75.0±2.3    | 65.7±22.1                                  | 95.0±1.4    | 134.0±52.9                                 | 62.9±1.8         | 5.7±1.1                                               |
|                     | TCR     | 81.2±1.3    | 98.1±14.4                                  | 94.4±1.8    | 71.4±29.9                                  | 46.2±3.8         | 5.9±1.0                                               |
|                     | TCR/DR1 | 73.9±2.5    | 79.8±32.5                                  | 95.9±0.7    | 102.9±30.1                                 | 56.9±4.4         | 7.1±0.6                                               |
| <b>Monocytes</b>    |         |             |                                            |             |                                            |                  |                                                       |
| CD14                | WT      | 0.1±0.0     | 0.1±0.0                                    | 0.0±0.0     | 0.0±0.0                                    | 0.2±0            | 0.0±0                                                 |
| HLA-DRB1*01:01+     |         | 0.0±0.0     | 0.0±0.0                                    | 0.0±0.0     | 0.0±0.0                                    | 0.0±0            | 0.0±0                                                 |
| CD14                | DR1     | 0.1±0.0     | 0.1±0.0                                    | 0.0±0.0     | 0.0±0.0                                    | 0.2±0            | 0.0±0                                                 |
| HLA-DRB1*01:01+     |         | 0.0±0.0     | 0.0±0.0                                    | 0.0±0.0     | 0.0±0.0                                    | 0,0±0            | 0.0±0                                                 |
| CD14                | TCR     | 0.1±0.0     | 0.1±0.0                                    | 0.0±0.0     | 0.0±0.0                                    | 0.2±0            | 0.0±0                                                 |
| HLA-DRB1*01:01+     |         | 0.0±0.0     | 0.0±0.0                                    | 0.0±0.0     | 0.0±0.0                                    | 0,0±0            | 0.0±0                                                 |
| CD14                | TCR/DR1 | 0.1±0.0     | 0.1±0.0                                    | 0.0±0.0     | 0.0±0.0                                    | 0.2±0            | 0.0±0                                                 |
| HLA-DRB1*01:01+     |         | 0.0±0.0     | 0.0±0.0                                    | 0.0±0.0     | 0.0±0.0                                    | 0.1±0            | 0.0±0                                                 |
| <b>Granulocytes</b> |         |             |                                            |             |                                            |                  |                                                       |
| Ly6C+Ly6G+          | WT      | 9.6±2.2     | 9.4±4.7                                    | 2.1±0.3     | 3.3±1.0                                    | 19.9±3.4         | 2.7±0.4                                               |
|                     | DR1     | 12.9±2.0    | 11.6±4.5                                   | 3.5±1.0     | 4.7±2.1                                    | 28.5±4.3         | 2.6±0.7                                               |
|                     | TCR     | 8.2±1.0     | 9.8±1.8                                    | 3.4±1.1     | 2.8±2.0                                    | 29.7±6.4         | 2.8±0.6                                               |
|                     | TCR/DR1 | 9.8±1.7     | 10.6±4.8                                   | 2.2±0.2     | 2.4±0.9                                    | 32.5±1.5         | 4.1±0.6                                               |
| <b>Leukocytes</b>   |         |             |                                            |             |                                            |                  |                                                       |
|                     | WT      |             | 86.6±27.4                                  |             | 149.2±31.0                                 |                  | 12.4±2.3                                              |
|                     | DR1     |             | 77.7±24.5                                  |             | 138.2±49.9                                 |                  | 8.4±1.5                                               |
|                     | TCR     |             | 108.6±15.0                                 |             | 74.1±29.4                                  |                  | 8.8±1.4                                               |
|                     | TCR/DR1 |             | 92.1±34.5                                  |             | 105.0±28.6                                 |                  | 11.4±1.1                                              |

287  
288

289 Grey numbers indicate numbers and percentage of TCR V $\beta$ 18<sup>+</sup> or HLA-DR1<sup>+</sup> cells,  
290 respectively. Data show the summary of five mice per group analyzed in five  
291 independent experiments. Mean  $\pm$  S.D. is shown.  
292  
293
